# Supplementary material for: Metagenomic Characterization of Bacterial Communities on Ready-to-Eat Vegetables and Effects of Household Washing on their Diversity and Composition
Source: PubMed Central journal article supplement (PMC6471099; doi:10.3390/pathogens8010037), 2019-03-19
Supplement: pathogens-08-00037-s001.pdf [file pathogens-08-00037-s001.pdf]

Article

# Supplementary Material: Metagenomic Characterization of Bacterial Communities on Ready-to-Eat Vegetables and Effects of Household Washing on their Diversity and Composition

Soultana Tatsika <sup>1,2</sup>, Katerina Karamanoli <sup>3</sup>, Hera Karayanni <sup>4</sup> and Savvas Genitsaris <sup>1,\*</sup>

<sup>1</sup> School of Economics, Business Administration and Legal Studies, International Hellenic University, Themi, 57001, Greece

<sup>2</sup> Hellenic Food Safety Authority (EFET), Pylaia, 57001, Greece

<sup>3</sup> School of Agriculture, Aristotle University of Thessaloniki, Thessaloniki, 54124, Greece

<sup>4</sup> Department of Biological Applications and Technology, University of Ioannina, Ioannina, 45100, Greece

\* Correspondence: [s.genitsaris@ihu.edu.gr](mailto:s.genitsaris@ihu.edu.gr)

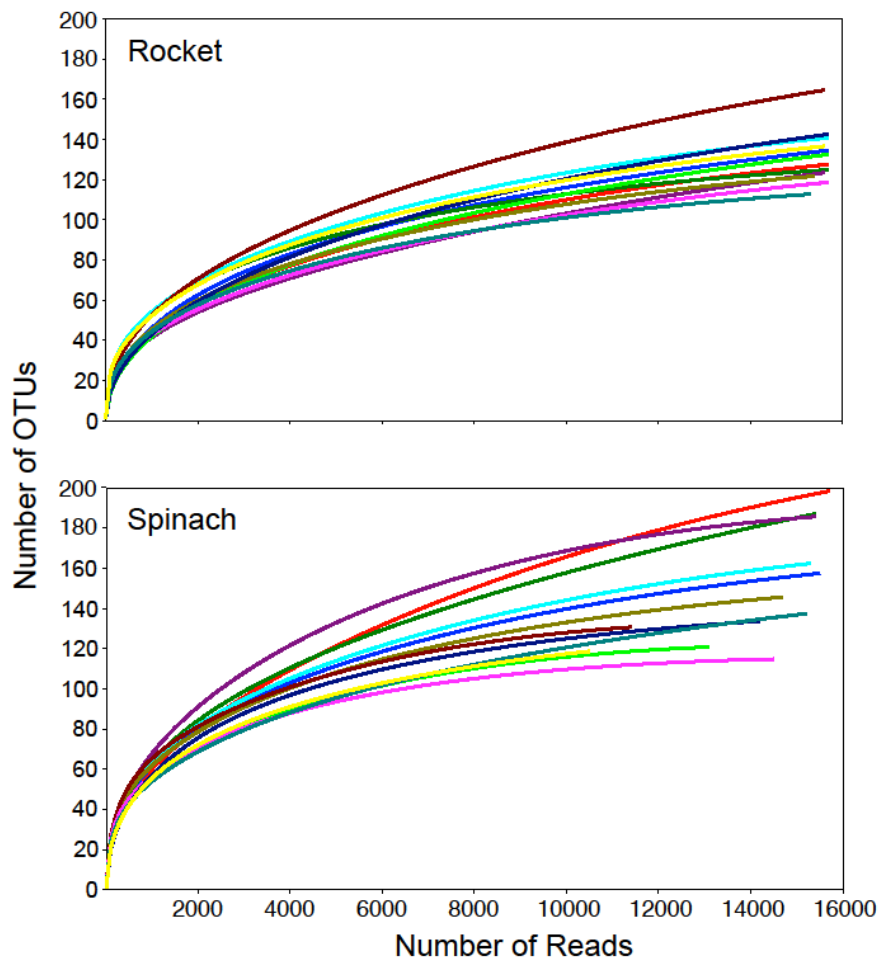

**Supplementary Figure S1.** Rarefaction curves representing the number of OTUs against the number of high-quality reads.

**Supplementary Table S1:** OTUs number, the richness estimator  $S_{\text{chao1}}$  and  $\alpha$ -diversity measurements (Simpson, Shannon and Equitability) per sample.

| <b>Samples</b> | <b>Number of OTUs</b> | <b><math>S_{\text{chao1}}</math></b> | <b>Simpson</b> | <b>Shannon</b> | <b>Equitability</b> |
|----------------|-----------------------|--------------------------------------|----------------|----------------|---------------------|
| RN1            | 128                   | 151.8                                | 0.62           | 1.80           | 0.37                |
| RN2            | 135                   | 169.2                                | 0.73           | 2.00           | 0.41                |
| RN3            | 125                   | 135.5                                | 0.84           | 2.57           | 0.53                |
| RN4            | 141                   | 157                                  | 0.85           | 2.61           | 0.53                |
| RW1            | 119                   | 142.8                                | 0.64           | 1.87           | 0.39                |
| RW2            | 143                   | 182.2                                | 0.58           | 1.65           | 0.33                |
| RW3            | 113                   | 124                                  | 0.84           | 2.37           | 0.50                |
| RW4            | 137                   | 159.5                                | 0.91           | 2.91           | 0.59                |
| RV1            | 124                   | 175.3                                | 0.56           | 1.65           | 0.34                |
| RV2            | 133                   | 172.4                                | 0.54           | 1.56           | 0.32                |
| RV3            | 122                   | 134.2                                | 0.86           | 2.39           | 0.50                |
| RV4            | 165                   | 216.8                                | 0.80           | 2.27           | 0.44                |
| SN1            | 199                   | 243.3                                | 0.76           | 2.49           | 0.47                |
| SN2            | 158                   | 178.8                                | 0.89           | 2.85           | 0.56                |
| SN3            | 188                   | 300.5                                | 0.88           | 2.72           | 0.52                |
| SN4            | 163                   | 184.8                                | 0.90           | 2.96           | 0.58                |
| SW1            | 115                   | 115.8                                | 0.87           | 2.81           | 0.59                |
| SW2            | 134                   | 140.6                                | 0.84           | 2.50           | 0.51                |
| SW3            | 138                   | 175.3                                | 0.90           | 2.85           | 0.58                |
| SW4            | 119                   | 132                                  | 0.87           | 2.63           | 0.55                |
| SV1            | 186                   | 191.8                                | 0.88           | 2.90           | 0.56                |
| SV2            | 121                   | 123                                  | 0.87           | 2.70           | 0.56                |
| SV3            | 146                   | 160.5                                | 0.92           | 3.08           | 0.62                |
| SV4            | 131                   | 135.1                                | 0.90           | 2.97           | 0.61                |
